# Supplementary material
Source: Springer Nature journal article supplement (https://www.springermedizin.de/resource/supplementary/13098_2014_388_MOESM3_ESM.docx/9670962)
Supplement: MOESM3 [file 9670962]

Table 3

Association of irisin with HOMA-β in fully adjusted model

|  | NGT | |  | T2DM | |
| --- | --- | --- | --- | --- | --- |
|  | *β* | *P value* |  | *β* | *P value* |
| Model 1 | 0.3 | **0.02** |  | 0.053 | 0.688 |
| Model 2 | 0.345 | **0.016** |  | 0.006 | 0.971 |
| Model 3 | 0.41 | **0.006** |  | 0.056 | 0.693 |
| Model 4 | 0.349 | **0.012** |  | 0.069 | 0.642 |
| Model 5 | 1.872 | **0.025** |  | -0.039 | 0.926 |

Model 1: unadjusted. Model 2: adjusted for ALT, AST, urea, creatinine,

uric acid, and eGFR. Model 3: adjusted for waist circumference, hip

circumference, WHR, BMI, muscle mass, fat mass, and percentage

body fat. Model 4: adjusted for TC, TG, HDL-C, LDL-C, and FFA.

Model 5: adjusted for 2h PG, HbA1C, insulin, and HOMA-IR.
